# Supplementary material for: Enhanced NO2 Sensing Performance of ZnO-SnO2 Heterojunction Derived from Metal-Organic Frameworks
Source: MDPI journal article supplement (doi:10.3390/nano12213726), 2022-10-23
Supplement: s1 [file s1]

## Supporting information

Humidity test: To investigate the NO<sub>2</sub> sensing performance under humidity environment, the target gas was humidified by passing through a quartz flask filled with saturated solutions of K<sub>2</sub>CO<sub>3</sub> and pure deionized water to attain the relative humidity (RH) levels of 43%±2% and 90%±2%, respectively. Relative humidity and temperature of gas flow were detected by Intelligent Humi/Temp Data Logger produced by YOWEXA Sensor System CO., LTD. The relative humidity and temperature probe was fixed at the outlet of the quartz flask to measure the relative humidity and temperature of gas flow.

**Table S1.** EDS element result of S2.

| Element | Weight% | Atomic% |
|---------|---------|---------|
| O K     | 28.80   | 66.39   |
| Zn L    | 45.30   | 25.56   |
| Sn L    | 25.90   | 8.05    |
| Totals  | 100.00  |         |

**Table S2.** EDS element result of S3.

| Element | Weight% | Atomic% |
|---------|---------|---------|
| O K     | 32.69   | 75.44   |
| Zn L    | 14.28   | 8.06    |
| Sn L    | 53.03   | 16.49   |
| Totals  | 100.00  |         |

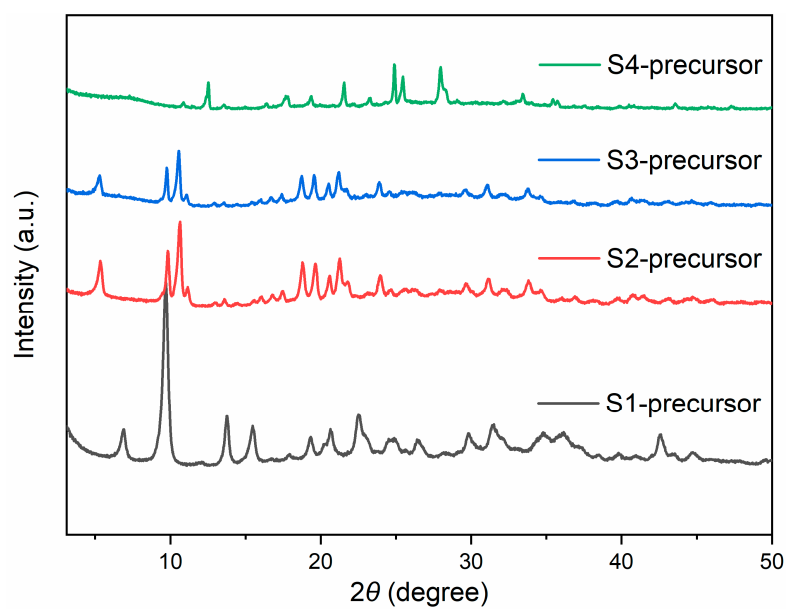

**Figure S1.** XRD of precursor.

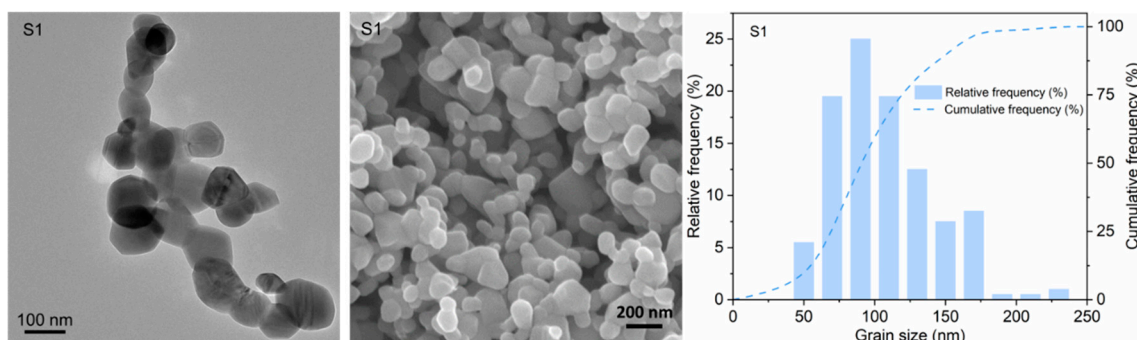

**Figure S2.** TEM, SEM images and corresponding grain size analysis of S1.

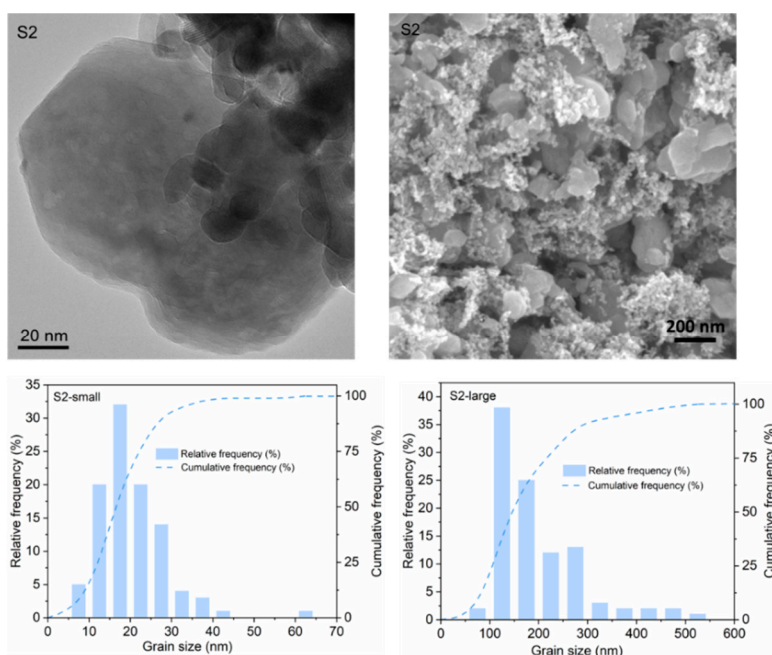

**Figure S3.** TEM, SEM images and corresponding grain size analysis of S2.

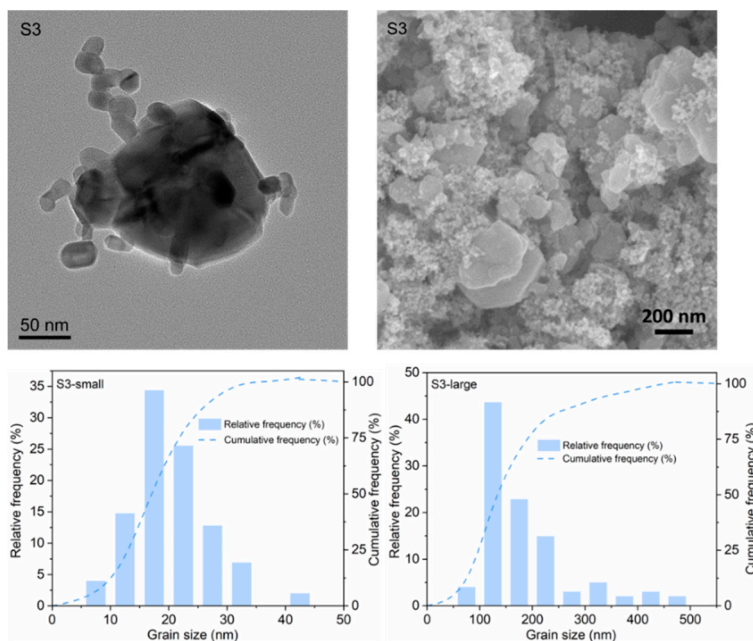

**Figure S4.** TEM, SEM images and corresponding grain size analysis of S3.

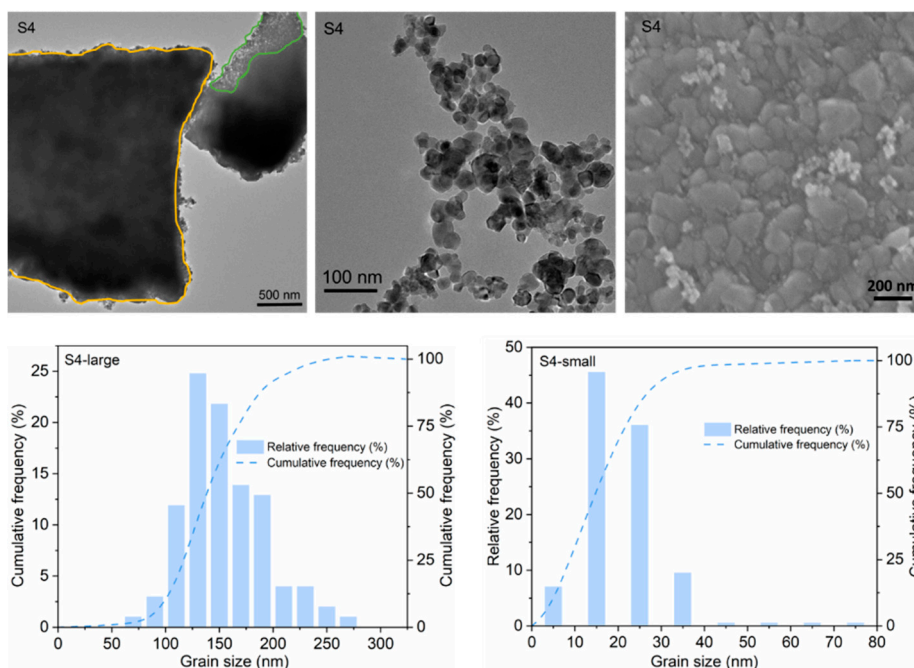

**Figure S5.** TEM, SEM images and corresponding grain size analysis of S4.

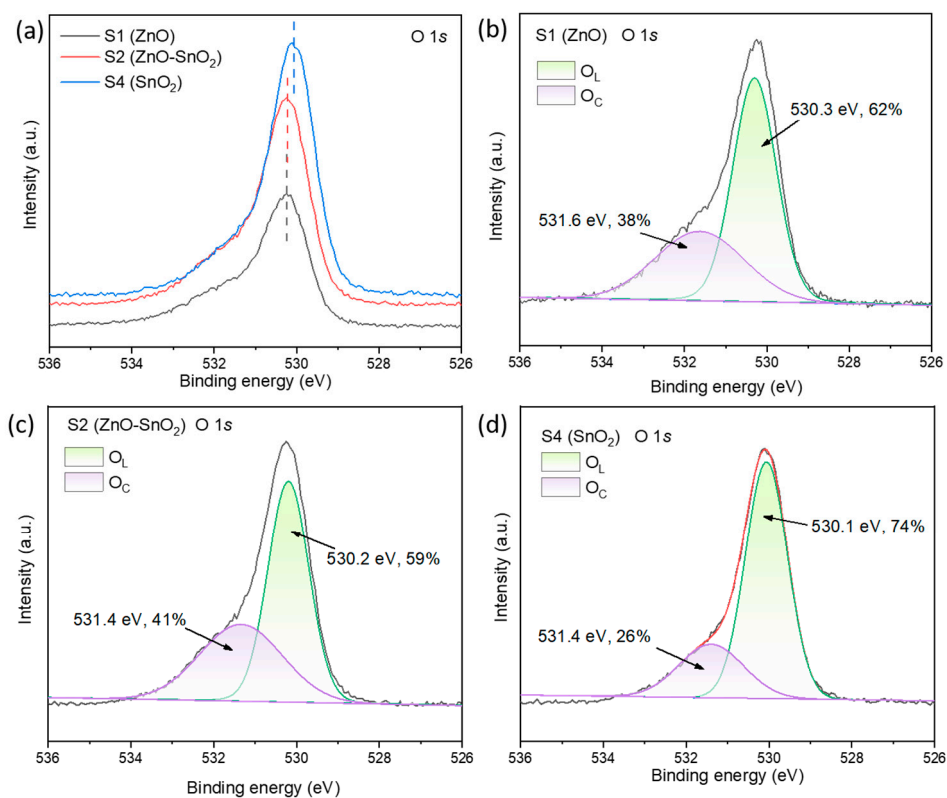

**Figure S6.** XPS curve of (a) O 1s for sample S1, S2 and S4; (b)-(d) O 1s peak area fitting results of S1, S2 and S4.

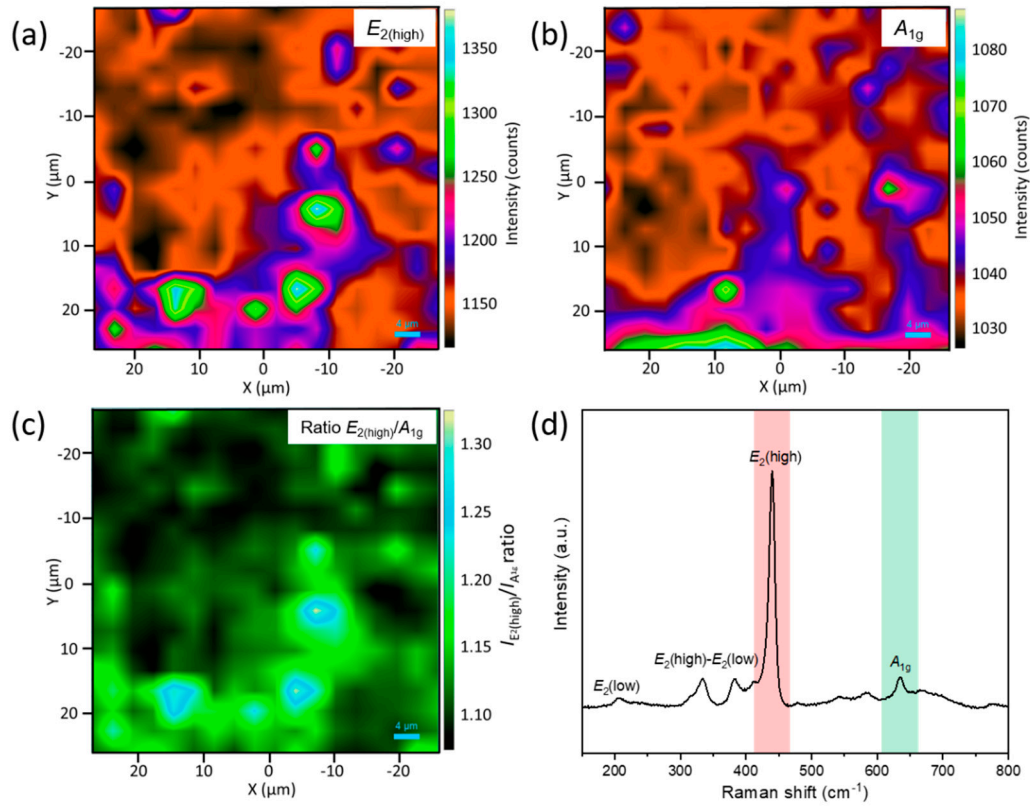

**Figure S7.** Raman mapping and spectra of ZnO-SnO<sub>2</sub>. The intensity of Raman peak **(a)**  $E_{2(\text{high})}$ , **(b)**  $A_{1g}$ , **(c)**  $I_{E_{2(\text{high})}}/I_{A_{1g}}$ , **(d)** Raman spectra of ZnO-SnO<sub>2</sub>.

The intensity of Raman spectroscopy can be used to quantitative analysis the amount, degree of crystallinity and distribution of different phases in the material. The peak intensity located around 439  $\text{cm}^{-1}$  and 635  $\text{cm}^{-1}$ , assigned to  $E_{2(\text{high})}$  and  $A_{1g}$ , which are the characteristic vibration modes of ZnO and SnO<sub>2</sub>, respectively. The distribution of the  $I_{E_{2(\text{high})}}/I_{A_{1g}}$  ratio represents the distribution of different phase at the selected point, providing the spatial information of the two phases in micro level.

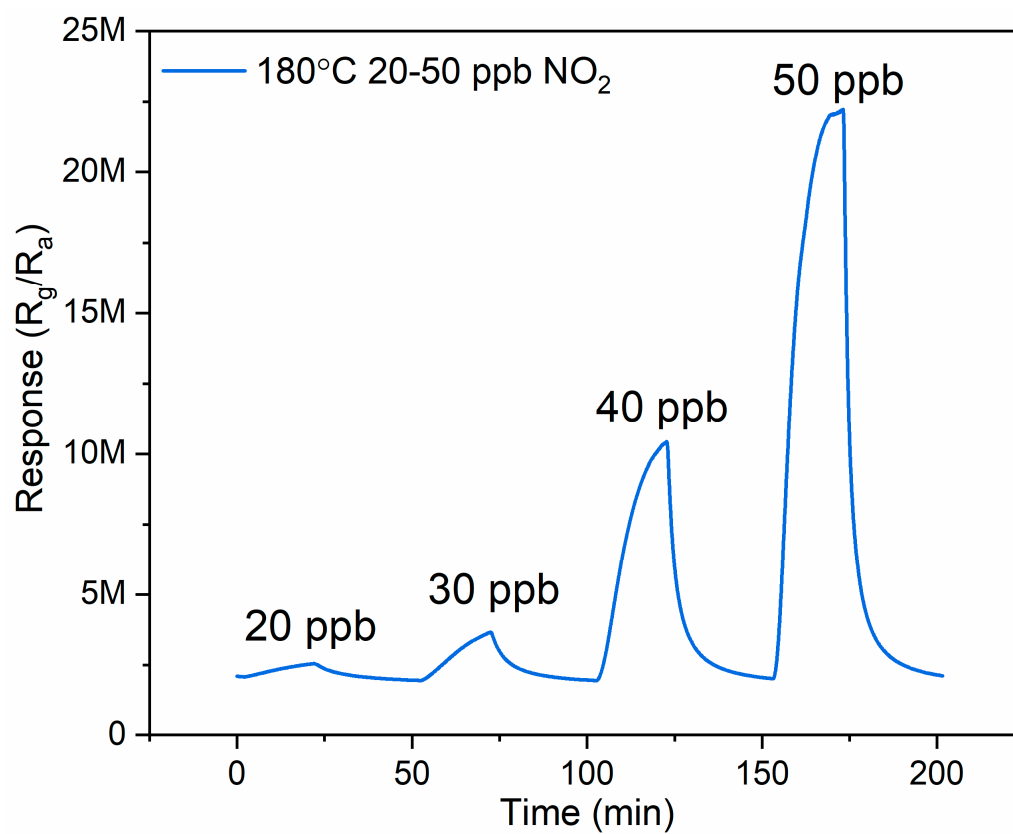

**Figure S8.** The real time resistance of sample S2 towards 20-50 ppb NO<sub>2</sub>.

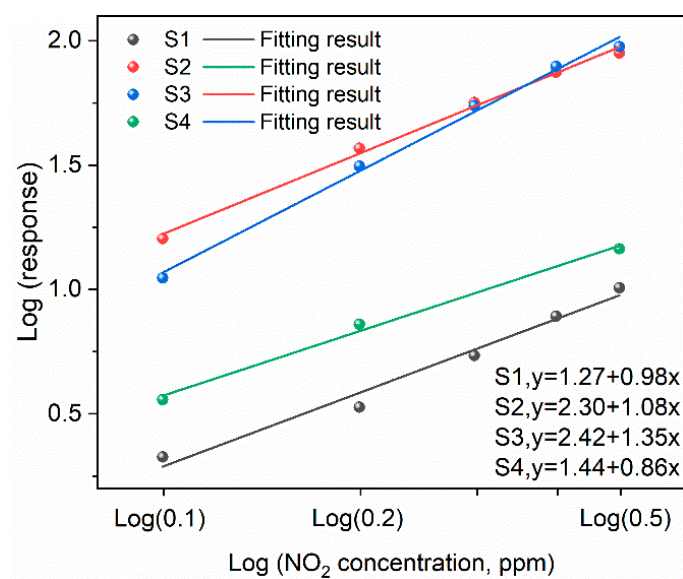

**Figure S9.** The correlation between response value and  $\text{NO}_2$  concentration and the fitting curve.
